# Supplementary material for: Regulation of ITGA3 by the dual-stranded microRNA-199 family as a potential prognostic marker in bladder cancer
Source: PubMed Central journal article supplement — Br J Cancer. 2017 Mar 21;116(8):1077–87. doi: 10.1038/bjc.2017.43 (PMC5396103; doi:10.1038/bjc.2017.43), 2017-03-21
Supplement: bjc201743x1.pdf [file bjc201743x1.pdf]

Supplementary Table 1: Patient characteristics

| Bladder cancer             |      |         |
|----------------------------|------|---------|
| Total number               | 32   |         |
| Median Age (years) (range) | 71.5 | (43-92) |
| Gender                     |      |         |
| Male                       | 22   | 68.80%  |
| Female                     | 10   | 31.20%  |
| Pathological tumor stage   |      |         |
| pTis                       | 0    | 0%      |
| pTa                        | 5    | 15.60%  |
| pT1                        | 7    | 21.90%  |
| pT2                        | 11   | 34.40%  |
| pT3                        | 3    | 9.30%   |
| pT4                        | 3    | 9.30%   |
| unknown                    | 3    | 9.30%   |
| Tumor grade                |      |         |
| G1                         | 1    | 3.10%   |
| G2                         | 13   | 40.60%  |
| G3                         | 16   | 50.00%  |
| unknown                    | 2    | 6.30%   |
| Metastasis                 |      |         |
| M 0                        | 28   | 87.50%  |
| M 1                        | 2    | 6.25%   |
| unknown                    | 2    | 6.25%   |
| Venous invasion            |      |         |
| v 0                        | 7    | 21.90%  |
| v 1                        | 6    | 18.70%  |
| unknown                    | 19   | 59.40%  |
| Lymph duct invasion        |      |         |
| ly 0                       | 8    | 25.00%  |
| ly 1                       | 5    | 15.60%  |
| unknown                    | 19   | 59.40%  |
| Operation method           |      |         |
| TURBT                      | 26   | 81.20%  |
| Cystectomy                 | 6    | 18.80%  |
