# Supplementary material for: Regulation of ITGA3 by the dual-stranded microRNA-199 family as a potential prognostic marker in bladder cancer
Source: PubMed Central journal article supplement — Br J Cancer. 2017 Mar 21;116(8):1077–87. doi: 10.1038/bjc.2017.43 (PMC5396103; doi:10.1038/bjc.2017.43), 2017-03-21
Supplement: bjc201743x2.pdf [file bjc201743x2.pdf]

Supplementary Table 2: Sequences of each gene

| Gene Symbol | NCBI GeneID | Species | Forward               | Reverse              |
|-------------|-------------|---------|-----------------------|----------------------|
| GUSB        | 2990        | Human   | CGTCCCACCTAGAATCTGCT  | TTGCTCACAAAGGTCACAGG |
| ITGA3       | 3675        | Human   | TCAACCTGGATACCCGATTCC | GCTCTGTCTGCCGATGGAG  |
