# Supplementary material for: Regulation of ITGA3 by the dual-stranded microRNA-199 family as a potential prognostic marker in bladder cancer
Source: PubMed Central journal article supplement — Br J Cancer. 2017 Mar 21;116(8):1077–87. doi: 10.1038/bjc.2017.43 (PMC5396103; doi:10.1038/bjc.2017.43), 2017-03-21
Supplement: bjc201743x3.pdf [file bjc201743x3.pdf]

Supplementary Table 3: 64 Significantly enriched pathways regulated by/IR-199 family

| KEGG entry number | Annotations                                                | Number of genes | P-value  | Genes                                                                                                                                                           |
|-------------------|------------------------------------------------------------|-----------------|----------|-----------------------------------------------------------------------------------------------------------------------------------------------------------------|
| 4012              | ErbB signaling pathway                                     | 16              | 8.52E-09 | NRG1 SHC3 PRKCB PIK3CB NRG3 ABL2 RPS6KB1 ERBB4 PAK4 PRKCA MAPK8 PAK1 PLCG1 PIK3R1 SOS2 CBL                                                                      |
| 4670              | Leukocyte transendothelial migration                       | 17              | 6.66E-08 | F11R PRKCB PIK3CB MMP2 RAPGEF4 NOX1 PXN ITK PRKCA VCL RAPGEF3 ARHGAP5 PLCG1 CTNNA2 PIK3R1 MAPK14 ROCK1                                                          |
| 4141              | Protein processing in endoplasmic reticulum                | 20              | 1.03E-07 | UBE2J1 YOD1 HSPA5 UGGT1 ATF6 HSPA6 UBE2D3 SEC24A MAPK8 EIF2AK1 MAP3K5 MOGS EDEM1 TRAM1 UBE2D4 DNAJ3 SSR3 LMAN2 SSR1 VCP                                         |
| 5200              | Pathways in cancer                                         | 29              | 3.25E-07 | WNT4 FGF2 KLK3 IKBK G E2F3 EPAS1 PRKCB PIK3CB MMP2 ITGA3 AR RUNX1 HHP TCEB1 PRKCA MAPK8 PLCG1 CTNNA2 PIK3R1 FZD3 SOS2 ARNT2 RB1 TRAF3 SLC2A1 PAX8 TRAF1 HGF CBL |
| 4722              | Neurotrophin signaling pathway                             | 16              | 1.35E-06 | CAMK4 IRS1 IRS4 SHC3 PIK3CB IRAK2 MAPK8 MAP3K5 RPS6KA2 YWHAG PLCG1 PIK3R1 MAPK14 SOS2 PDK1 NTRK3                                                                |
| 4510              | Focal adhesion                                             | 20              | 3.21E-06 | SHC3 PRKCB PIK3CB CNND2 ITGA3 PXN PAK4 ITGA8 PRKCA VCL ARHGAP5 MAPK8 PAK1 PIK3R1 ITGA9 TNC SOS2 ROCK1 ITGB8 HGF                                                 |
| 4720              | Long-term potentiation                                     | 11              | 6.69E-06 | CAMK4 PRKCB GRM5 PRKCA RAPS6KA2 PRKX GRIN2A PRKACB                                                                                                              |
| 4310              | Wnt signaling pathway                                      | 16              | 1.49E-05 | NLK WNT4 PRKCB CNND2 VANGL1 PRKCA PPP2R5E MAPK8 PPP2R1A PRKX FZD3 NKD1 BTRC ROCK1 TBL1XR1 PRKACB                                                                |
| 4910              | Insulin signaling pathway                                  | 15              | 1.52E-05 | IRS1 IRS4 SHC3 PIK3CB RPS6KB1 PDE3B MAPK8 PIK3R1 PRKX SOS2 RHOQ PRKAA2 PRKCI CBL PRKACB                                                                         |
| 5211              | Renal cell carcinoma                                       | 10              | 5.31E-05 | EPAS1 PIK3CB PAK4 TCEB1 PAK1 PIK3R1 SOS2 ARNT2 SLC2A1 HGF                                                                                                       |
| 4660              | T cell receptor signaling pathway                          | 12              | 1.12E-04 | IKBK G PIK3CB ITK PAK4 PAK1 PLCG1 PIK3R1 MAPK14 SOS2 GRAP2 PDK1 CBL                                                                                             |
| 4724              | Glutamatergic synapse                                      | 13              | 1.18E-04 | PRKCB GRM5 ADCY7 PRKCA GRIN2B GRIA1 SLC1A2 GLUL PRKX GRIN2A GRIN3A ADRBK2 PRKACB                                                                                |
| 5214              | Glioma                                                     | 9               | 1.25E-04 | SHC3 E2F3 PRKCB PIK3CB PRKCA PLCG1 PIK3R1 SOS2 RB1                                                                                                              |
| 5223              | Non-small cell lung cancer                                 | 8               | 2.00E-04 | E2F3 PRKCB PIK3CB PRKCA PLCG1 PIK3R1 SOS2 RB1                                                                                                                   |
| 4540              | Gap junction                                               | 10              | 3.68E-04 | HTR2A PRKCB TUBB1 GRM5 GUCY1A2 ADCY7 PRKCA PRKX SOS2 PRKACB                                                                                                     |
| 230               | Purine metabolism                                          | 14              | 3.87E-04 | PDE11A PDE7B ENPP1 PDE5A GUCY1A2 ADCY7 PDE10A PDE3B PDE7A POLA2 ATIC POLR3A GMPR AK4                                                                            |
| 5220              | Chronic myeloid leukemia                                   | 9               | 3.90E-04 | IKBK G SHC3 E2F3 PIK3CB RUNX1 PIK3R1 SOS2 RB1 CBL                                                                                                               |
| 4070              | Phosphatidylinositol signaling system                      | 9               | 5.28E-04 | CDS2 PRKCB PIK3CB DGKE PRKCA SYNJ1 PLCG1 PIK3R1 PLCE1                                                                                                           |
| 4664              | Fc epsilon RI signaling pathway                            | 9               | 5.81E-04 | PRKCB PIK3CB PRKCA MAPK8 PLCG1 PIK3R1 MAPK14 SOS2 PDK1                                                                                                          |
| 4062              | Chemokine signaling pathway                                | 15              | 6.62E-04 | IKBK G SHC3 PRKCB PIK3CB PXN ITK ADCY7 PAK1 PIK3R1 PRKX SOS2 ROCK1 ADRBK2 PRKACB CXCR6                                                                          |
| 4810              | Regulation of actin cytoskeleton                           | 16              | 7.82E-04 | FGF2 ABI2 PIK3CB ITGA3 ARHGEF1 NCKA1 PXN PAK4 ITGA8 VCL PAK1 PIK3R1 ITGA9 SOS2 ROCK1 ITGB8                                                                      |
| 5014              | Amyotrophic lateral sclerosis (ALS)                        | 7               | 7.95E-04 | GRIN2B GRIA1 SLC1A2 MAP3K5 MAPK14 TRIM40                                                                                                                        |
| 5160              | Hepatitis C                                                | 12              | 8.40E-04 | IKBK G PIK3CB DDX58 MAPK8 EIF2AK1 MAVS PIK3R1 PPP2R1A MAPK14 SOS2 TRAF3 PDK1                                                                                    |
| 4912              | GnRH signaling pathway                                     | 10              | 8.88E-04 | PRKCB MMP2 ADCY7 PRKCA MAPK8 FSHB PRKX MAPK14 SOS2 PRKACB                                                                                                       |
| 4020              | Calcium signaling pathway                                  | 14              | 1.07E-03 | CAMK4 HTR2A PRKCB GRM5 ERBB4 ADCY7 OXTR PRKCA PLCG1 PRKX SLC8A3 GRIN2A PRKACB PLCE1                                                                             |
| 4914              | Progesterone-mediated oocyte maturation                    | 9               | 1.30E-03 | PIK3CB ADCY7 PDE3B MAPK8 RPS6KA2 PIK3R1 PRKX MAPK14 PRKACB                                                                                                      |
| 5100              | Bacterial invasion of epithelial cells                     | 8               | 1.35E-03 | RHOG SHC3 PIK3CB PXN VCL CTNNA2 PIK3R1 CBL                                                                                                                      |
| 4960              | Aldosterone-regulated sodium reabsorption                  | 6               | 1.68E-03 | IRS1 IRS4 PRKCB PIK3CB PRKCA PIK3R1                                                                                                                             |
| 4962              | Vasopressin-regulated water reabsorption                   | 6               | 2.15E-03 | DYNLL2 DCTN6 AQP2 STX4 PRKX PRKACB                                                                                                                              |
| 5131              | Shigellosis                                                | 7               | 2.59E-03 | RHOG IKBK G VCL MAPK8 MAPK14 BTRC ROCK1                                                                                                                         |
| 250               | Alanine, aspartate and glutamate metabolism                | 5               | 2.73E-03 | CAD ASPA GLUL GOT2 GAD2                                                                                                                                         |
| 4120              | Ubiquitin mediated proteolysis                             | 11              | 3.06E-03 | UBE2J1 UBE2R2 BRCA1 UBE2D3 TCEB1 UBA6 RCHY1 UBE2D4 BTRC CBL UBA2                                                                                                |
| 4710              | Circadian rhythm - mammal                                  | 4               | 4.15E-03 | RORB BHLHE41 CLOCK BTRC                                                                                                                                         |
| 532               | Glycosaminoglycan biosynthesis - chondroitin sulfate       | 4               | 4.15E-03 | B3GAT2 CHSY3 XYLT2 B3GAT1                                                                                                                                       |
| 4512              | ECM-receptor interaction                                   | 8               | 4.28E-03 | SDC2 ITGA3 ITGA8 GP5 ITGA9 TNC DAG1 ITGB8                                                                                                                       |
| 5222              | Small cell lung cancer                                     | 8               | 4.28E-03 | IKBK G E2F3 PIK3CB ITGA3 PIK3R1 RB1 TRAF3 TRAF1                                                                                                                 |
| 5120              | Epithelial cell signaling in Helicobacter pylori infection | 7               | 4.42E-03 | F11R IKBK G MAPK8 PAK1 PLCG1 MAPK14 ATP6V1C2                                                                                                                    |
| 4514              | Cell adhesion molecules (CAMs)                             | 10              | 5.27E-03 | PVRL1 SDC2 F11R PDCC1LG ITGA8 NLGN1 CADM1 ITGA9 ITGB8 SELE                                                                                                      |
| 5110              | Vibrio cholerae infection                                  | 6               | 5.54E-03 | PRKCB PRKCA PLCG1 PRKX ATP6V1C2 PRKACB                                                                                                                          |
| 4622              | RIG-I-like receptor signaling pathway                      | 7               | 5.63E-03 | TRIM25 IKBK G DDX58 MAPK8 MAVS MAPK14 TRAF3                                                                                                                     |
| 5215              | Prostate cancer                                            | 8               | 5.67E-03 | KLK3 IKBK G E2F3 PIK3CB AR PIK3R1 SOS2 RB1                                                                                                                      |
| 4977              | Vitamin digestion and absorption                           | 4               | 5.74E-03 | TCN2 SLC46A1 BTD RBP2                                                                                                                                           |
| 5414              | Dilated cardiomyopathy                                     | 8               | 6.06E-03 | ITGA3 ITGA8 ADCY7 ITGA9 PRKX DAG1 ITGB8 PRKACB                                                                                                                  |
| 4520              | Adherens junction                                          | 7               | 6.08E-03 | PTPRB PVRL1 NLK PTPRJ VCL CTNNA2 FER                                                                                                                            |
| 4360              | Axon guidance                                              | 10              | 6.21E-03 | ARHGEF1 NTNG1 PAK4 SEMA4D PLXNA3 ABLIM1 PAK1 SEMA3E SLIT1 ROCK1                                                                                                 |
| 4114              | Oocyte meiosis                                             | 9               | 6.86E-03 | AR ADCY7 PPP2R5E RPS6KA2 YWHAG PPP2R1A PRKX BTRC PRKACB                                                                                                         |
| 600               | Sphingolipid metabolism                                    | 5               | 7.29E-03 | SGPP2 NEU3 SPTLC2 ACER2 ASAH2                                                                                                                                   |
| 4010              | MAPK signaling pathway                                     | 16              | 7.41E-03 | PPM1B NLK FGF2 IKBK G PRKCB HSPA6 TAOK1 PRKCA MAPK8 MAP3K5 RPS6KA2 PAK1 PRKX MAPK14 SOS2 PRKACB                                                                 |
| 4621              | NOD-like receptor signaling pathway                        | 6               | 7.90E-03 | TAB3 NLRP1 IKBK G SLUG1 MAPK8 MAPK14                                                                                                                            |
| 5221              | Acute myeloid leukemia                                     | 6               | 7.90E-03 | IKBK G PIK3CB RPS6KB1 RUNX1 PIK3R1 SOS2                                                                                                                         |
| 4270              | Vascular smooth muscle contraction                         | 9               | 8.14E-03 | PRKCB ARHGEF1 GUCY1A2 ADCY7 PRKCA PPP1R12E PRKX ROCK1 PRKACB                                                                                                    |
| 4370              | VEGF signaling pathway                                     | 7               | 8.17E-03 | PRKCB PIK3CB PXN PRKCA PLCG1 PIK3R1 MAPK14                                                                                                                      |
| 400               | Phenylalanine, tyrosine and tryptophan biosynthesis        | 2               | 8.85E-03 | GOT2 TAT                                                                                                                                                        |
| 4974              | Protein digestion and absorption                           | 7               | 1.01E-02 | XPNPEP2 SLC3A1 CQL9A2 KCN5 SLC8A3 KCN13 SLC16A10                                                                                                                |
| 3040              | Spliceosome                                                | 9               | 1.07E-02 | SF3A1 SRSF1 WBP11 HNRNPK PPIE HSPA6 PRPF4 U2SURP PRPF40A                                                                                                        |
| 564               | Glycerophospholipid metabolism                             | 7               | 1.08E-02 | CDS2 AGPAT4 DGKE AGPAT3 LCLAT1 LPGAT1 CHKA                                                                                                                      |
| 4620              | Toll-like receptor signaling pathway                       | 8               | 1.26E-02 | IKBK G PIK3CB TIRAP MAPK8 PIK3R1 TMED7 MAPK14 TRAF3                                                                                                             |
| 512               | Mucin type O-Glycan biosynthesis                           | 4               | 1.28E-02 | GCNT1 GALNT2 GALNT8 B4GALT5                                                                                                                                     |
| 4350              | TGF-beta signaling pathway                                 | 7               | 1.30E-02 | RPS6KB1 PPP2R1A ROCK1 ACVR2B SP1 ACVR2A ACVR1C                                                                                                                  |
| 4930              | Type II diabetes mellitus                                  | 5               | 1.31E-02 | IRS1 IRS4 PIK3CB MAPK8 PIK3R1                                                                                                                                   |
| 770               | Partothenate and CoA biosynthesis                          | 3               | 1.42E-02 | ENPP1 PANK3 PANK2                                                                                                                                               |
| 561               | Glycerolipid metabolism                                    | 5               | 1.43E-02 | AGPAT4 DGKE AGPAT3 LCLAT1 PNPLA3                                                                                                                                |
| 4961              | Endocrine and other factor-regulated calcium reabsorption  | 5               | 1.69E-02 | PRKCB KLK2 PRKCA PRKX PRKACB                                                                                                                                    |
| 510               | N-Glycan biosynthesis                                      | 5               | 1.69E-02 | MGAT4A MGAT4C ST6GAL1 MOGS MGAT3                                                                                                                                |
