# Supplementary material for: Regulation of ITGA3 by the dual-stranded microRNA-199 family as a potential prognostic marker in bladder cancer
Source: PubMed Central journal article supplement — Br J Cancer. 2017 Mar 21;116(8):1077–87. doi: 10.1038/bjc.2017.43 (PMC5396103; doi:10.1038/bjc.2017.43), 2017-03-21
Supplement: bjc201743x4.pdf [file bjc201743x4.pdf]

Supplementary Table 4: 10 Upregulated genes involved in 'Pathways in cancer'

| Entrez<br>Gene ID | Gene<br>symbol | Description                                                                 | Gene Expression Omnibus<br>(GSE11783 + GSE31684) |             |          | TargetScan         |                    |
|-------------------|----------------|-----------------------------------------------------------------------------|--------------------------------------------------|-------------|----------|--------------------|--------------------|
|                   |                |                                                                             | Expression                                       | Fold change | P-value  | <i>miR-199-3p</i>  | <i>miR-199-5p</i>  |
|                   |                |                                                                             |                                                  |             |          | Conserved<br>sites | Conserved<br>sites |
| 1871              | <i>E2F3</i>    | E2F transcription factor 3                                                  | up                                               | 3.909       | 4.38E-05 | +                  | -                  |
| 354               | <i>KLK3</i>    | kallikrein related peptidase 3                                              | up                                               | 3.292       | 4.38E-05 | -                  | -                  |
| 6513              | <i>SLC2A1</i>  | solute carrier family 2 member 1                                            | up                                               | 3.05        | 1.37E-04 | -                  | -                  |
| 3675              | <i>ITGA3</i>   | integrin subunit alpha 3                                                    | up                                               | 3.042       | 4.23E-03 | +                  | +                  |
| 7849              | <i>PAX8</i>    | paired box 8                                                                | up                                               | 2.657       | 4.38E-05 | -                  | -                  |
| 8517              | <i>IKBKG</i>   | inhibitor of kappa light polypeptide gene enhancer in B-cells, kinase gamma | up                                               | 1.756       | 9.42E-05 | -                  | -                  |
| 7185              | <i>TRAF1</i>   | TNF receptor associated factor 1                                            | up                                               | 1.714       | 4.23E-03 | -                  | -                  |
| 5599              | <i>MAPK8</i>   | mitogen-activated protein kinase 8                                          | up                                               | 1.618       | 2.81E-04 | +                  | +                  |
| 6921              | <i>TCEB1</i>   | transcription elongation factor B subunit 1                                 | up                                               | 1.57        | 8.08E-03 | -                  | -                  |
| 5335              | <i>PLCG1</i>   | phospholipase C gamma 1                                                     | up                                               | 1.305       | 7.72E-03 | -                  | -                  |
