# Supplementary material for: Regulation of ITGA3 by the dual-stranded microRNA-199 family as a potential prognostic marker in bladder cancer
Source: PubMed Central journal article supplement — Br J Cancer. 2017 Mar 21;116(8):1077–87. doi: 10.1038/bjc.2017.43 (PMC5396103; doi:10.1038/bjc.2017.43), 2017-03-21
Supplement: bjc201743x5.pdf [file bjc201743x5.pdf]

Supplementary Table 5: Relationship between ITGA3 expression and clinicopathological factors in tissue microarray

| characteristics           | n  | ITGA3 expression |                    |            | P-value |
|---------------------------|----|------------------|--------------------|------------|---------|
|                           |    | low (0-2)        | intermediate (3-4) | high (5-6) |         |
| Normal and BC tissue      |    |                  |                    |            |         |
| Normal                    | 20 | 0                | 20                 | 0          | <0.0001 |
| cancer                    | 78 | 6                | 33                 | 39         |         |
| age at presentation       |    |                  |                    |            |         |
| under 65 years            | 39 | 2                | 11                 | 26         | 0.0131  |
| over 65 years             | 39 | 4                | 22                 | 13         |         |
| sex                       |    |                  |                    |            |         |
| male                      | 64 | 4                | 29                 | 31         | 0.3869  |
| female                    | 14 | 2                | 4                  | 8          |         |
| Histological grade        |    |                  |                    |            |         |
| low grade                 | 37 | 2                | 18                 | 17         | 0.6439  |
| high grade                | 35 | 4                | 13                 | 18         |         |
| unknown                   | 6  | 0                | 2                  | 4          |         |
| tumor status              |    |                  |                    |            |         |
| NMIBC                     | 21 | 3                | 12                 | 6          | 0.0562  |
| MIBC                      | 57 | 3                | 21                 | 33         |         |
| pathological diagnosis    |    |                  |                    |            |         |
| Urothelial carcinoma (UC) | 66 | 6                | 26                 | 34         | 0.3415  |
| non-UC                    | 12 | 0                | 7                  | 5          |         |
